# Supplementary material for: Deactivation of signal amplification by reversible exchange catalysis, progress towards in vivo application
Source: Royal Society of Chemistry journal article supplement (doi:10.1039/c5cc01896j), 2015-01-01
Supplement: c5cc01896j1.pdf [file c5cc01896j1.pdf]

## Deactivation of the signal amplification by reversible exchange catalysis, progress towards *in vivo* application

Ryan E. Mewis, Marianna Fekete, Gary G. R. Green, Adrian C. Whitwood and Simon B. Duckett\*

*Centre for Hyperpolarisation in Magnetic Resonance, University of York, Heslington, York, YO10 5NY, UK. Tel +44 1904 432564; Email: simon.duckett@york.ac.uk*

### Contents

|                                                                                                  |   |
|--------------------------------------------------------------------------------------------------|---|
| 1. General .....                                                                                 | 2 |
| 2. Characterisation data for 3 .....                                                             | 3 |
| 3. UV-vis data of 2 and 3 .....                                                                  | 5 |
| 4. Selective NOESY data for $[\text{Ir}(\text{IMes})(\text{H})_2(\text{bpy})\text{L}^2]^+$ ..... | 6 |
| 5. UV-vis data for the addition of bpy to solution containing $\text{L}^2$ and 1 .....           | 6 |
| 6. Addition of 1,10-phenanthroline to a sample consisting of 1 and pyridine .....                | 7 |
| 7. References .....                                                                              | 9 |

## 1. General

Ir(IMes)(COD)Cl, **1**, was synthesised as previously described.[1] Nicotinamide (**L**<sup>1</sup>), pyridine (**L**<sup>2</sup>), 1,10-phenanthroline and deuterated methanol were purchased from Sigma-Aldrich and used as received.

NMR samples consisted of **1** and **L**<sup>1</sup> or **L**<sup>2</sup> in a ratio of 1 : 8, and we made up in 0.6 ml of deuterated methanol (Young's capped NMR tube experiments) or 3 ml when an NMR flow system experiment was undertaken. Young's capped NMR tubes were degassed three times on a Schlenk line whilst immersing the solution in a dry CO<sub>2</sub>/ acetone slush bath. *Parahydrogen* was introduced into the NMR tube using a home-built generator; the *parahydrogen* had been formed by cooling the dihydrogen gas to 36 K over a bed of Fe<sub>2</sub>O<sub>3</sub>. For the flow measurements, the *parahydrogen* was supplied by a Bruker *parahydrogen* generator.

For hyperpolarisation experiments, *parahydrogen* was either bubbled through the solution for 10-20 s (flow measurements) or shaken in the fringe field of the spectrometer magnet for 10 s. The magnetic field experienced by the sample during the *parahydrogen* transfer process was either measured using a Hall probe, or precisely controlled in the vertical direction by a copper coil as described previously.[2]

NMR data was collected on a Bruker Advance III NMR spectrometer (9.4 T) that was fitted with a broad band inverse probe (BBI) or a flow probe at 298 K unless specified otherwise.

The NMR signal enhancement values were calculated by comparing the integrals of the thermal peaks for the specified protons of **L**<sup>1</sup> (or **L**<sup>2</sup>) to those observed after hyperpolarisation transfer at the indicated magnetic field. The results are not corrected for relaxation losses during the transfer time (2.9 s for flow measurements and  $\approx$  4 s for Young's capped NMR tube experiments) into the magnet and hence reflect experimentally observed values.

Single crystals of **3** (C<sub>48</sub>H<sub>51</sub>BF<sub>4</sub>IrN<sub>5</sub>) were grown from *d*<sub>6</sub>-benzene solution. A suitable crystal was selected and placed in oil on micromount, on a SuperNova, Dual, Cu at zero, Eos diffractometer. The crystal was kept at 110.05(10) K during data collection. Using Olex2 [3], the structure was solved with the Superflip [4] structure solution program using Charge Flipping and refined with the ShelXL [5] refinement package using Least Squares minimisation.

## 2. Characterisation data for cation 3

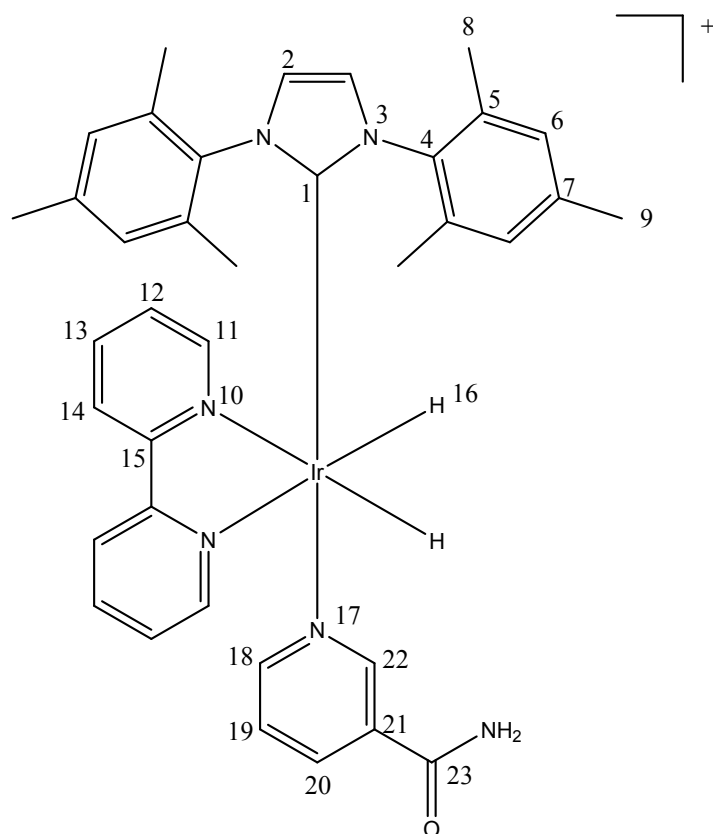

sTable 1: NMR chemical shift and specific spin-spin coupling data for **3**, collected in MeOH-*d*<sub>4</sub> solution at 253 K.

| Atom number | <sup>1</sup> H δ /ppm | J <sub>HH</sub> / Hz | <sup>13</sup> C δ /ppm | <sup>15</sup> N δ /ppm |
|-------------|-----------------------|----------------------|------------------------|------------------------|
| 1           |                       |                      | 186.4                  |                        |
| 2           | 6.97 (s)              |                      | 122.5                  |                        |
| 3           |                       |                      |                        | 209                    |
| 4           |                       |                      | 137.3                  |                        |
| 5           |                       |                      | 135.9                  |                        |
| 6           | 6.87 (s)              |                      | 128.8                  |                        |
| 7           |                       |                      | 138.7                  |                        |
| 8           | 1.88 (s)              |                      | 17.0                   |                        |
| 9           | 2.36 (s)              |                      | 19.7                   |                        |
| 10          |                       |                      |                        | 268                    |
| 11          | 8.58 (d)              | 5.4                  | 155.6                  |                        |
| 12          | 7.39 (dd)             | 8.0, 5.4             | 127.3                  |                        |
| 13          | 8.00 (dd)             | 8.3, 8.0             | 136.8                  |                        |
| 14          | 8.20 (d)              | 8.3                  | 123.1                  |                        |
| 15          |                       |                      | 156.8                  |                        |
| 16          | -20.15 (s)            |                      |                        |                        |
| 17          |                       |                      |                        | 241                    |
| 18          | 8.36 (dt)             | 6.0, 1.2             | 155.8                  |                        |
| 19          | 7.00 (dd)             | 8.0, 6.0             | 124.5                  |                        |
| 20          | 7.96 (d)              | 8.0                  | 134.8                  |                        |
| 21          |                       |                      | 130.7                  |                        |
| 22          | 8.63 (d)              | 1.2                  | 153.1                  |                        |
| 23          |                       |                      | 166.4                  |                        |

(b)

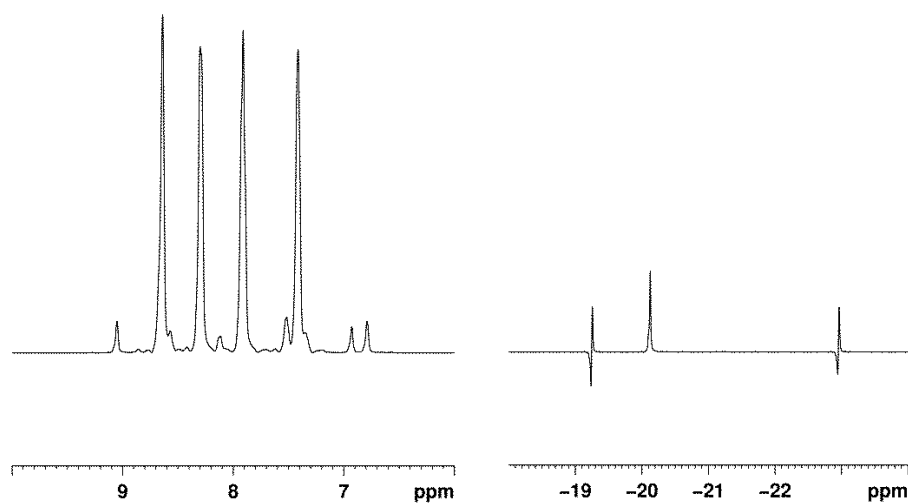

(a)

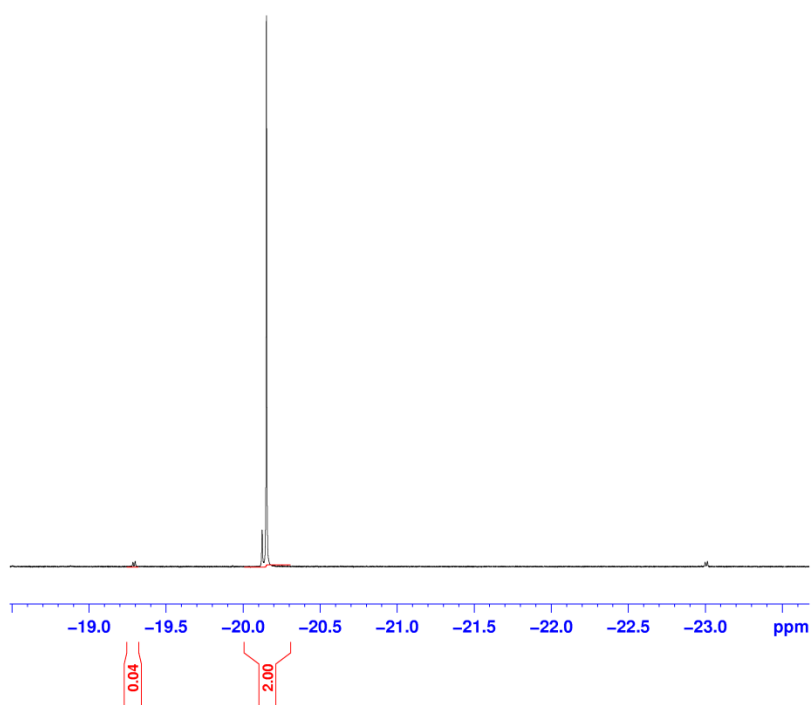

Figure 1. (a) NMR spectrum showing the hydride region of a quenched sample revealing the conversion of **2** to **3**. (b) NMR spectrum showing that the aromatic region no longer exhibits SABRE while weak PHIP is seen in the hydride region of the quenched sample for the minor isomer of **3**.

Figure 1a shows the hydride region of an NMR spectrum for a bpy quenched sample. Complete conversion of **2** into **3** is indicated. The hydride signals at  $\delta$  -19.29 ( $J_{\text{HH}} = -8$  Hz) and at  $\delta$  -23.00 ( $J_{\text{HH}} = -8$  Hz) are due to a minor isomer of **3** where the hydrides are *trans* to nicotinamide and bpy. They occur at *ca.* 4% of the level of the main isomer. After a shake and sample introduction, a new NMR

spectrum was obtained with a 45 degree angle. While the hydride signals of the minor isomer show PHIP no SABRE enhancement of nicotinamide is seen.

### 3. Characterisation data for cation 4

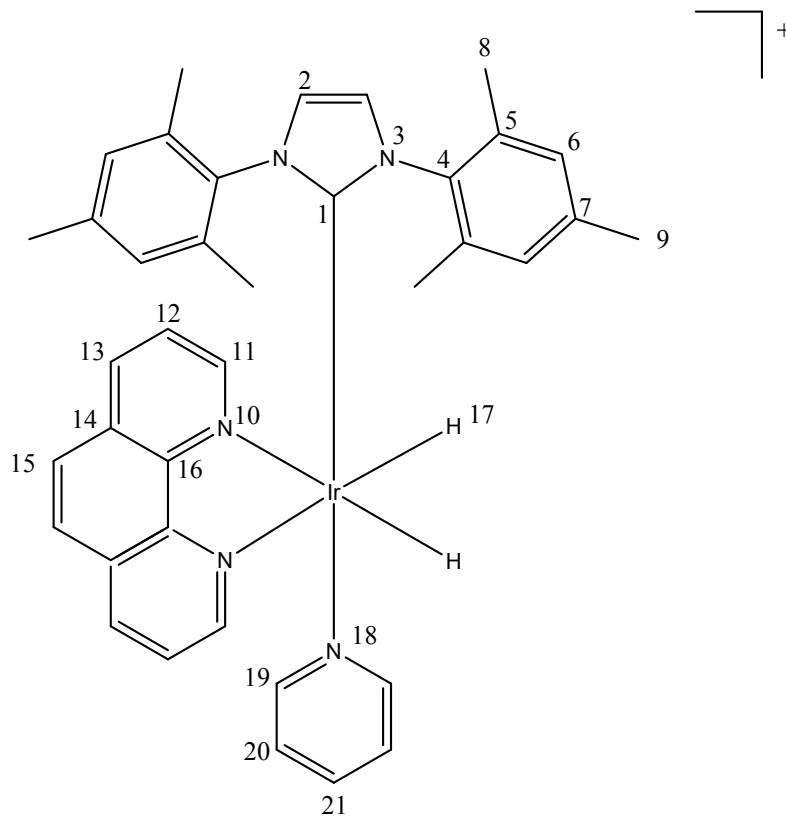

sTable 2: NMR Chemical shift and spin-spin coupling data for **4**, collected in MeOH-*d*<sub>4</sub> solution at 298 K.

| Atom number | <sup>1</sup> H δ /ppm | <i>J</i> <sub>HH</sub> / Hz | <sup>13</sup> C δ /ppm | <sup>15</sup> N δ /ppm |
|-------------|-----------------------|-----------------------------|------------------------|------------------------|
| 1           |                       |                             |                        |                        |
| 2           | 6.93 (s)              |                             | 122.5                  |                        |
| 3           |                       |                             |                        | 108.3                  |
| 4           |                       |                             | 137.3                  |                        |
| 5           |                       |                             | 135.4                  |                        |
| 6           | 6.67 (s)              |                             | 128.3                  |                        |
| 7           |                       |                             | 138.2                  |                        |
| 8           | 1.81 (s)              |                             | 16.8                   |                        |
| 9           | 2.26 (s)              |                             | 19.8                   |                        |
| 10          |                       |                             |                        | 165.9                  |
| 11          | 9.07 (d)              | 4.85                        | 155.6                  |                        |
| 12          | 7.80 (dd)             | 4.85, 8.2                   | 126.0                  |                        |
| 13          | 8.57 (d)              | 8.2                         | 136.5                  |                        |
| 14          |                       |                             | 130.7                  |                        |
| 15          | 8.00                  |                             | 127.2                  |                        |
| 16          |                       |                             | 148.1                  |                        |
| 17          | -20.00                |                             |                        |                        |
| 18          |                       |                             |                        | 239.1                  |
| 19          | 8.18 (m)              | 6.0                         | 153.3                  |                        |

|    |           |          |       |  |
|----|-----------|----------|-------|--|
| 20 | 6.79 (dd) | 7.5, 6.0 | 124.8 |  |
| 21 | 7.41 (m)  | 7.5      | 136.2 |  |

#### 4. UV-vis data for 2 and 3

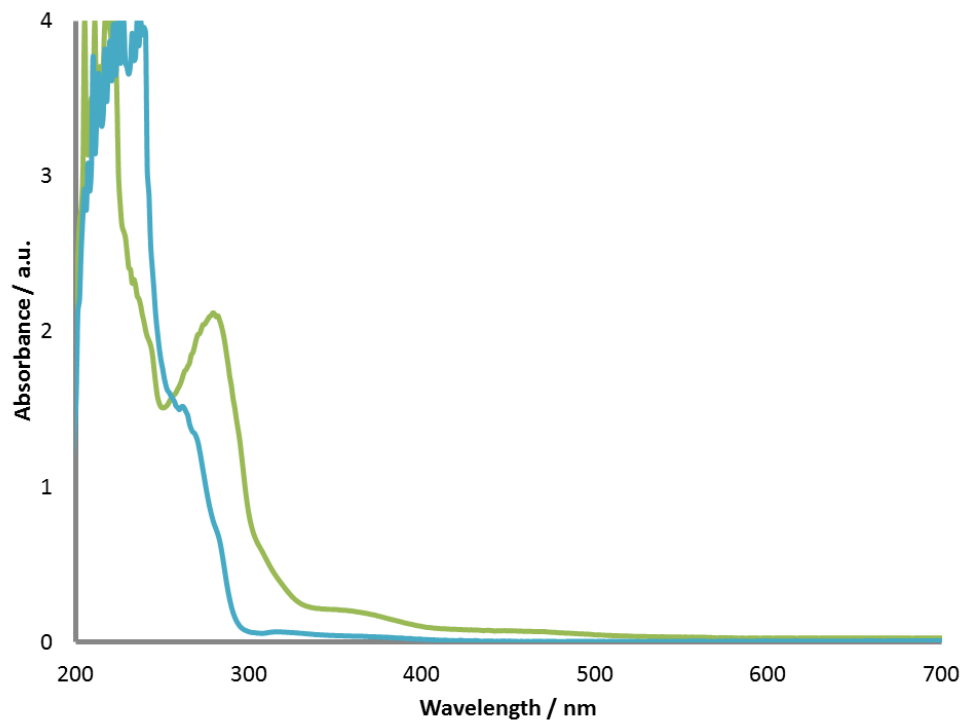

sFigure 2: UV-vis spectra of **2** (–) and **3** (–).

## 5. Selective NOESY data for $[\text{Ir}(\text{IMes})(\text{H})_2(\text{bpy})\text{L}^2]\text{Cl}$ (**3**)

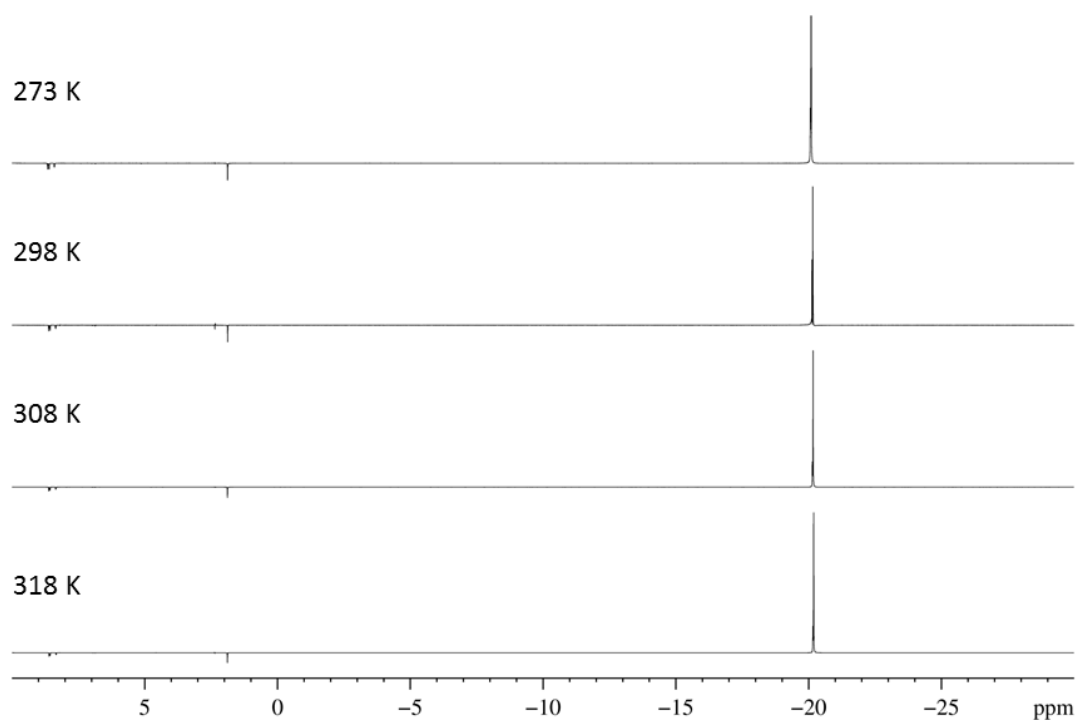

Figure 3: Selective  $^1\text{H}$  NMR NOESY spectra showing the effect of exciting the hydride resonance at  $\delta -20.15$  for **3** at different temperatures. No exchange peaks are visible.

## 6. UV-vis data following the change after the addition of bpy to solution of $\text{L}^2$ and **2**

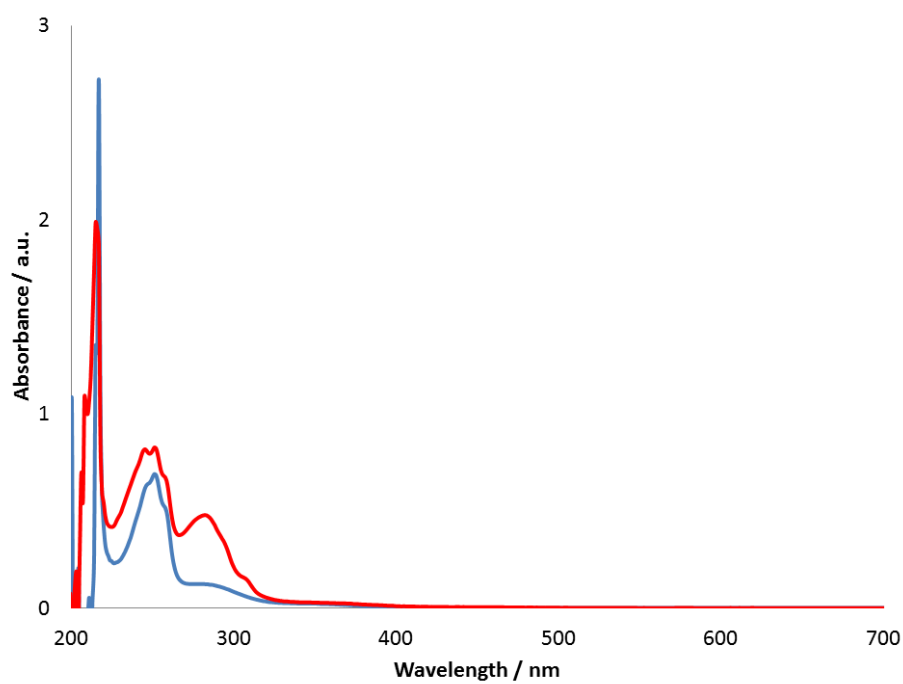

Figure 4: UV-vis spectra of  $[\text{Ir}(\text{IMes})(\text{L}^2)_3(\text{H})_2]\text{Cl}$  (**2**) (—) and  $[\text{Ir}(\text{IMes})(\text{bpy})(\text{L}^2)(\text{H})_2]\text{Cl}$  (**3**) (—).

**7. Change in the NMR signal enhancement level seen for the bulk nicotinamide proton adding 2,2'-bipyridine as a function of time.**

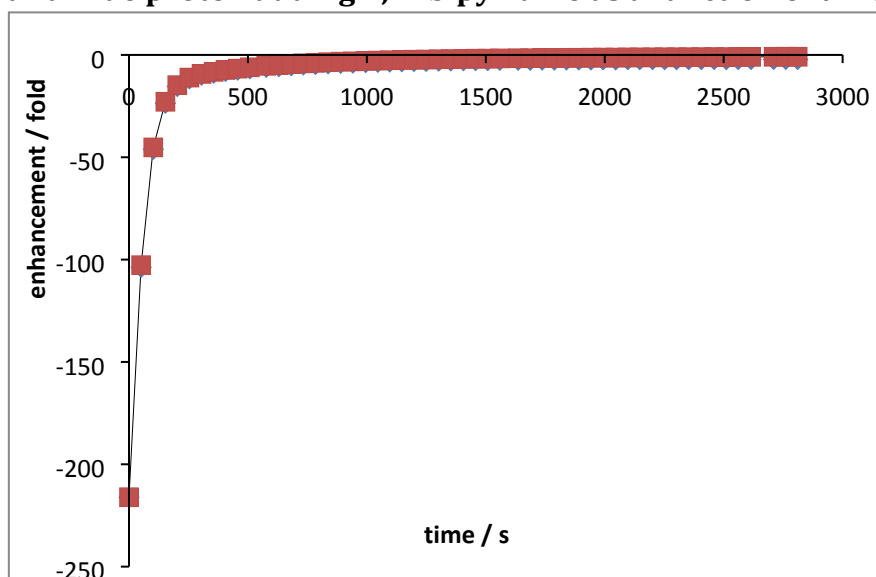

sFigure 5: Change in the nicotinamide proton signal enhancement values after the addition of 1.1 equivalents (relative to nicotinamide) of 2,2'-bipyridine to a sample consisting of **1** (10 mg) and nicotinamide (15 mg) in 3 mL of MeOD solution.

We note that the hyperpolarised control sample observed 6 seconds after polarisation transfer and the quenched sample, six seconds after transfer result in similar signal intensities of the H<sub>a</sub> resonance of nicotinamide.

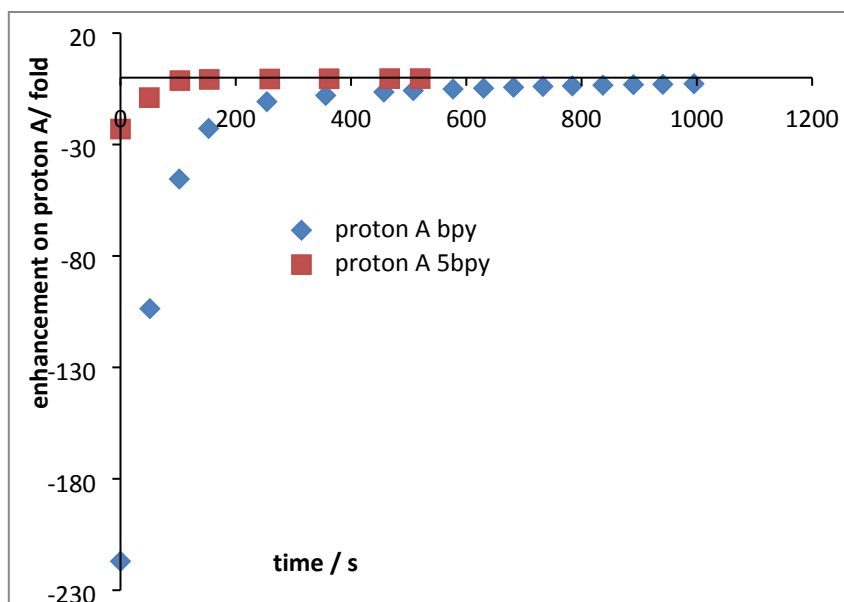

sFigure 6: Comparison in the signal enhancement decay for nicotinamide proton A with time after the addition of 1.1 (blue) and 5.1 equivalents (red), relative to nicotinamide, of 2,2'-bipyridine to a sample of **1** (10 mg) and nicotinamide (15 mg) under Hin 3 mL of MeOD solution.



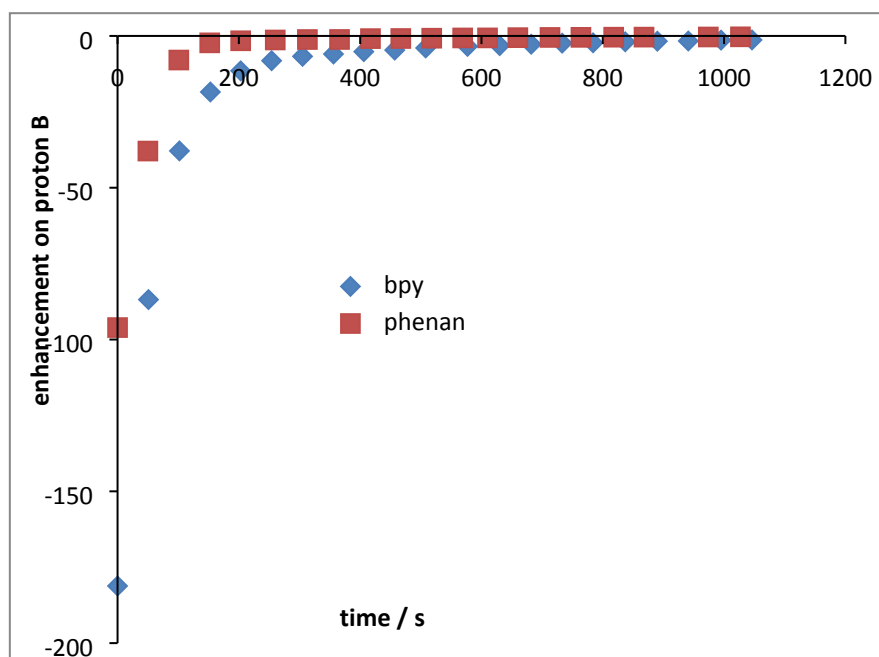

Figure 7: Comparative traces showing the signal enhancement decay of the nicotinamide proton A signal with time after the addition of 1,1,2,2'-bipyridine (blue) or 1,10-phenanthroline (red) to samples consisting of **1** (10 mg) and nicotinamide (15 mg) in 3 mL of MeOD solution.

### 8. Addition of 1,10-phenanthroline to a sample consisting of **1** and pyridine

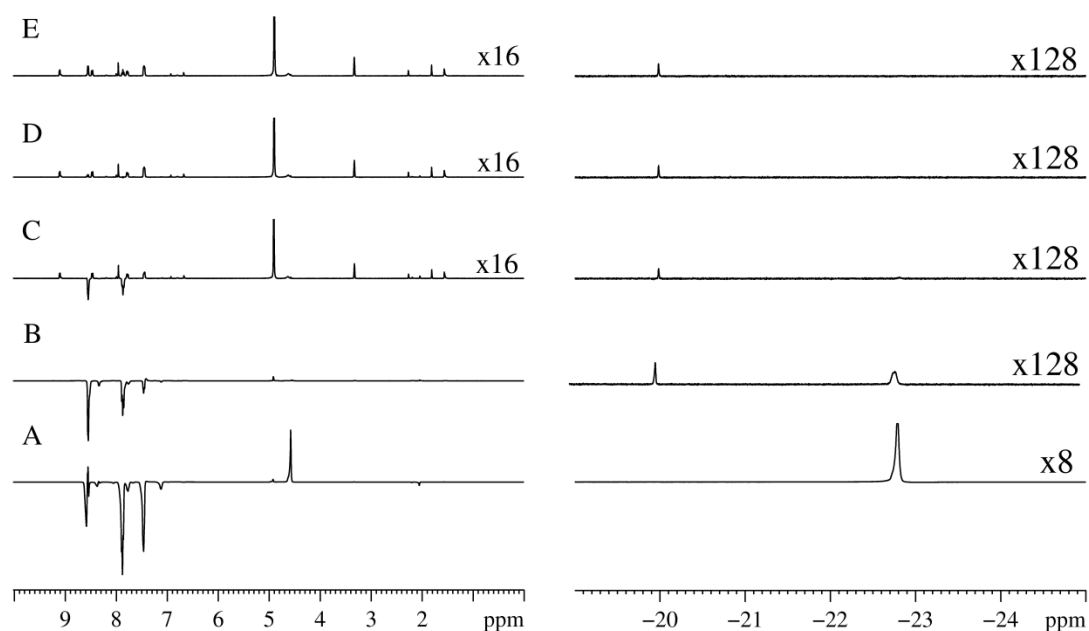

Figure 8: Series of NMR spectra showing how the addition of 1,10-phenanthroline to a sample consisting of **1** (2 mg) and pyridine (1  $\mu$ L) in MeOD effects both speciation and hyperpolarisation effects. Trace A is prior to 1,10-phenanthroline addition and reflects the trace after the sample has been shaken in a PTF of 65 G. Trace B was obtained with a 5 degree pulse following the sample being shaken at a PTF of 65 G and then 1,10-phenanthroline (4 mg) added in a minimal amount

of MeOD. Traces C-E were collected after B, without the sample being reshaken, degassed or removed from the magnet. The total time elapsed between the acquiring of traces B and E is 94 s.

## 9. Kinetic data for the exchange of nicotinamide in **2**

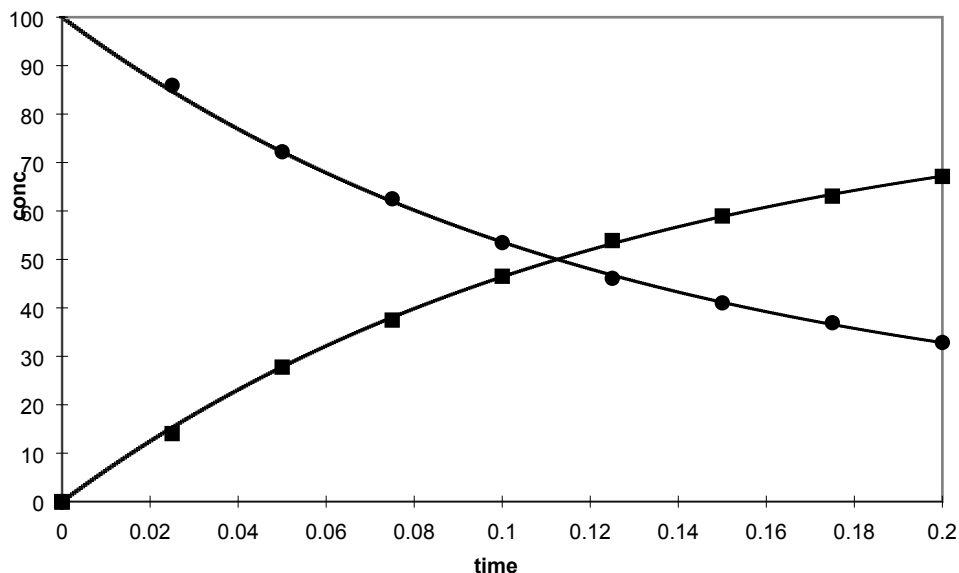

sFigure 9: Raw data and fitted data for ligand exchange in **2**

sTable 4 EXSY data for nicotinamide dissociation in **2**

| time(t) | Experimental data |        | Fitted data |        |
|---------|-------------------|--------|-------------|--------|
|         | [A]               | [B]    | [A]         | [B]    |
| 0       | 0.00              | 100.00 | 0.00        | 100.00 |
| 0.025   | 14.05             | 85.95  | 15.29       | 84.71  |
| 0.05    | 27.77             | 72.23  | 27.80       | 72.20  |
| 0.075   | 37.48             | 62.52  | 38.03       | 61.97  |
| 0.1     | 46.53             | 53.47  | 46.40       | 53.60  |
| 0.125   | 53.90             | 46.10  | 53.25       | 46.75  |
| 0.15    | 58.97             | 41.03  | 58.85       | 41.15  |
| 0.175   | 63.07             | 36.93  | 63.43       | 36.57  |
| 0.2     | 67.14             | 32.86  | 67.18       | 32.82  |

Kinetic parameters used in the fit

$$k_{(AB)} = 1.28 \text{ s}^{-1} \text{ and } k_{(BA)} = 6.74 \pm 0.07 \text{ s}^{-1}$$

Here,  $k_{BA}$  is the rate of nicotinamide dissociation. The data was obtained by EXSY and used the mixing times indicated.

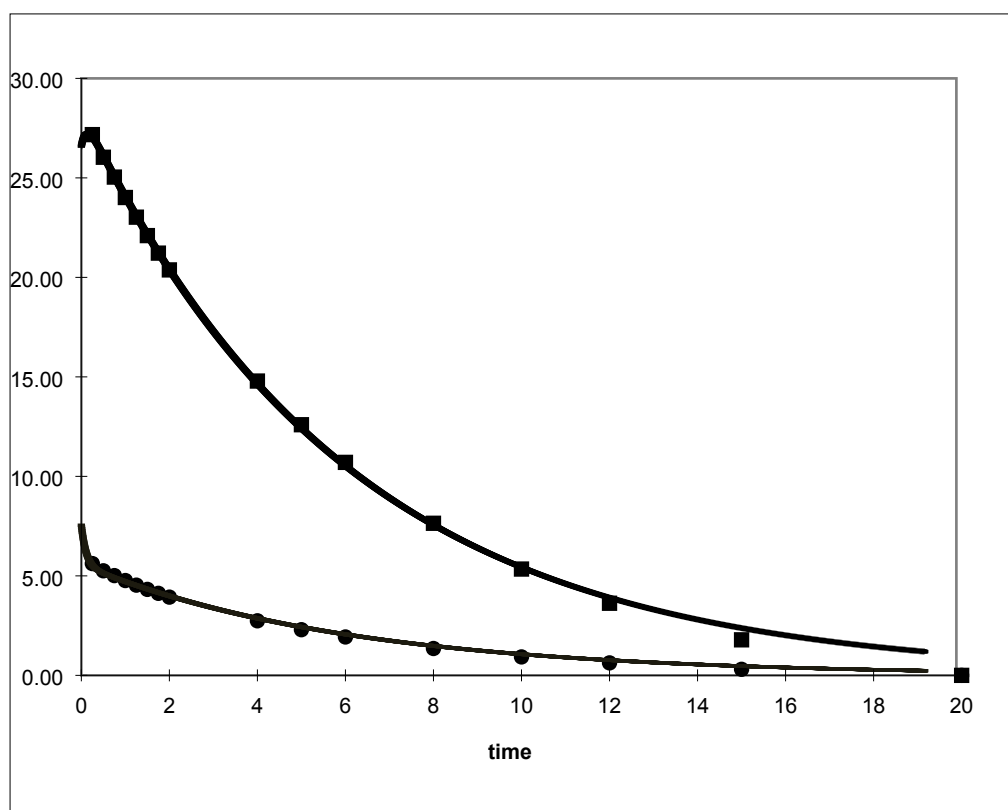

sFigure 10: Raw  $T_1$  relaxation data and simulated data for resonance Ha, free (■) and bound (●) of nicotinamide in the presence of **2** and  $H_2$ .

Values of  $k_{(AB)} = 1.46 \text{ s}^{-1}$  and  $k_{(BA)} = 6.74 \text{ s}^{-1}$ ,  $T_{1(\text{free})} 39.94$  and  $T_{1(\text{bound})} 1.13 \text{ s}$  were used in the simulation which was based on the procedure of Bain.<sup>6</sup>

## 10. Crystallographic data for **3**

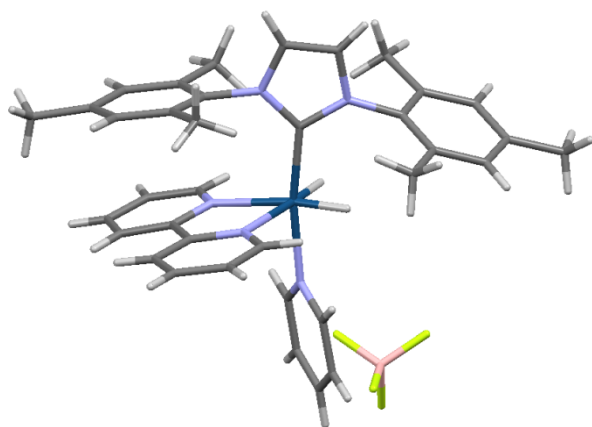

sFigure 10. X-Ray Crystallography structure of **3**

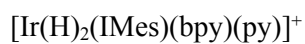

sTable 4: Key bond angles and distances in **3**

### Bond distances (Å)

|                       |       |                       |       |
|-----------------------|-------|-----------------------|-------|
| H1-Ir                 | 1.351 | N2 <sub>bpy</sub> -Ir | 2.156 |
| H2-Ir                 | 1.440 | N3 <sub>py</sub> -Ir  | 2.110 |
| N1 <sub>bpy</sub> -Ir | 2.151 | C1-Ir                 | 1.981 |

### Bond Angles

|                                         |        |
|-----------------------------------------|--------|
| H1-Ir-H2                                | 84.39  |
| N1 <sub>bpy</sub> -Ir-N2 <sub>bpy</sub> | 75.78  |
| H1-Ir-N1 <sub>bpy</sub>                 | 100.56 |
| H2-Ir-N2 <sub>bpy</sub>                 | 99.16  |
| N1 <sub>bpy</sub> -Ir-C                 | 103.92 |
| N2 <sub>bpy</sub> -Ir-C                 | 95.62  |
| N3 <sub>py</sub> -Ir-C                  | 170.15 |

sTable 5: Crystal data and structure refinement for **3**

|                   |                                                                  |
|-------------------|------------------------------------------------------------------|
| Empirical formula | C <sub>48</sub> H <sub>51</sub> BF <sub>4</sub> IrN <sub>5</sub> |
| Formula weight    | 976.94                                                           |
| Temperature/K     | 110.05(10)                                                       |
| Crystal system    | triclinic                                                        |
| Space group       | P-1                                                              |
| a/Å               | 10.3919(3)                                                       |
| b/Å               | 13.6438(4)                                                       |
| c/Å               | 15.4722(6)                                                       |
| α/°               | 95.673(3)                                                        |
| β/°               | 95.753(3)                                                        |
| γ/°               | 98.925(3)                                                        |

|                                             |                                                                |
|---------------------------------------------|----------------------------------------------------------------|
| Volume/Å <sup>3</sup>                       | 2141.59(12)                                                    |
| Z                                           | 2                                                              |
| ρ <sub>calc</sub> /cm <sup>3</sup>          | 1.515                                                          |
| μ/mm <sup>-1</sup>                          | 3.175                                                          |
| F(000)                                      | 984.0                                                          |
| Crystal size/mm <sup>3</sup>                | 0.2126 × 0.1703 × 0.1364                                       |
| Radiation                                   | MoKα (λ = 0.7107)                                              |
| 2θ range for data collection/°              | 6.702 to 60.732                                                |
| Index ranges                                | -12 ≤ h ≤ 14, -19 ≤ k ≤ 18, -20 ≤ l ≤ 20                       |
| Reflections collected                       | 22046                                                          |
| Independent reflections                     | 11269 [R <sub>int</sub> = 0.0346, R <sub>sigma</sub> = 0.0596] |
| Data/restraints/parameters                  | 11269/54/553                                                   |
| Goodness-of-fit on F <sup>2</sup>           | 1.067                                                          |
| Final R indexes [I ≥ 2σ (I)]                | R <sub>1</sub> = 0.0331, wR <sub>2</sub> = 0.0663              |
| Final R indexes [all data]                  | R <sub>1</sub> = 0.0408, wR <sub>2</sub> = 0.0713              |
| Largest diff. peak/hole / e Å <sup>-3</sup> | 1.44/-0.93                                                     |

sTable 6: Fractional Atomic Coordinates (×10<sup>4</sup>) and Equivalent Isotropic Displacement Parameters (Å<sup>2</sup>×10<sup>3</sup>) for sbd1505. U<sub>eq</sub> is defined as 1/3 of of the trace of the orthogonalised U<sub>ij</sub> tensor.

| Atom | x       | y       | z       | U(eq)    |
|------|---------|---------|---------|----------|
| C1   | 5117(3) | 2632(2) | 3208(2) | 15.5(6)  |
| C2   | 2892(3) | 2395(2) | 3206(2) | 21.0(7)  |
| C3   | 3388(3) | 2046(2) | 3921(2) | 20.5(7)  |
| C4   | 3727(3) | 3055(2) | 1908(2) | 16.9(6)  |
| C5   | 3396(3) | 2303(2) | 1209(2) | 21.5(7)  |
| C6   | 3114(3) | 2588(3) | 376(2)  | 26.9(8)  |
| C7   | 3206(4) | 3580(3) | 236(2)  | 27.3(8)  |
| C8   | 3568(3) | 4303(3) | 948(2)  | 22.1(7)  |
| C9   | 3805(3) | 4060(2) | 1798(2) | 18.2(7)  |
| C10  | 3365(4) | 1218(3) | 1344(3) | 34.2(9)  |
| C11  | 2925(4) | 3863(3) | -674(2) | 40.8(10) |
| C12  | 4107(3) | 4873(2) | 2552(2) | 22.9(7)  |
| C13  | 5582(3) | 1822(2) | 4556(2) | 15.5(6)  |
| C14  | 5915(3) | 2357(2) | 5381(2) | 18.3(7)  |
| C15  | 6749(3) | 1985(2) | 5983(2) | 20.5(7)  |
| C16  | 7223(3) | 1103(2) | 5779(2) | 19.7(7)  |
| C17  | 6814(3) | 563(2)  | 4965(2) | 19.0(7)  |
| C18  | 5987(3) | 905(2)  | 4341(2) | 17.7(7)  |
| C19  | 5389(4) | 3299(2) | 5633(2) | 25.0(8)  |
| C20  | 8173(4) | 743(2)  | 6428(2) | 26.8(8)  |
| C21  | 5536(3) | 308(2)  | 3465(2) | 22.3(7)  |
| C22  | 8428(3) | 1390(2) | 3206(2) | 18.6(7)  |
| C23  | 9328(3) | 906(2)  | 3624(2) | 21.7(7)  |
| C24  | 9977(3) | 1329(2) | 4430(2) | 22.0(7)  |

|      |           |            |            |           |
|------|-----------|------------|------------|-----------|
| C25  | 9704(3)   | 2231(2)    | 4789(2)    | 20.1(7)   |
| C26  | 8770(3)   | 2676(2)    | 4346(2)    | 15.5(6)   |
| C27  | 8429(3)   | 3642(2)    | 4685(2)    | 15.0(6)   |
| C28  | 8938(3)   | 4142(2)    | 5500(2)    | 20.2(7)   |
| C29  | 8597(3)   | 5057(2)    | 5756(2)    | 22.2(7)   |
| C30  | 7747(4)   | 5450(2)    | 5196(2)    | 23.2(7)   |
| C31  | 7257(3)   | 4909(2)    | 4395(2)    | 18.4(7)   |
| C32  | 8815(3)   | 4838(2)    | 2449(2)    | 18.9(7)   |
| C33  | 9858(3)   | 5345(2)    | 2099(2)    | 22.6(7)   |
| C34  | 10711(3)  | 4812(3)    | 1711(2)    | 24.5(8)   |
| C35  | 10490(3)  | 3782(2)    | 1681(2)    | 21.7(7)   |
| C36  | 9429(3)   | 3329(2)    | 2050(2)    | 17.1(6)   |
| lr1  | 6881.7(2) | 3144.2(2)  | 2899.3(2)  | 13.71(4)  |
| N1   | 3937(3)   | 2749.3(18) | 2769.4(17) | 16.8(6)   |
| N2   | 4735(3)   | 2183.6(18) | 3917.3(18) | 17.3(6)   |
| N3   | 8127(3)   | 2258.1(17) | 3561.0(17) | 14.8(5)   |
| N4   | 7572(3)   | 4016.0(17) | 4141.1(16) | 14.8(5)   |
| N5   | 8591(3)   | 3837.0(19) | 2429.6(17) | 17.1(6)   |
| C43  | 7481(18)  | -628(14)   | 1526(18)   | 39.2(15)  |
| C43A | 7335(12)  | -568(10)   | 1490(12)   | 39.2(15)  |
| C48A | 6851(9)   | 167(8)     | 1055(10)   | 45(3)     |
| C47A | 7692(11)  | 832(5)     | 660(5)     | 40(2)     |
| C46A | 9016(10)  | 762(5)     | 698(5)     | 47(2)     |
| C45A | 9500(8)   | 27(7)      | 1132(7)    | 49(2)     |
| C44A | 8659(12)  | -638(8)    | 1528(10)   | 42.2(19)  |
| C44  | 8770(20)  | -422(13)   | 1442(16)   | 42.2(19)  |
| C45  | 9228(17)  | 386(11)    | 1022(11)   | 49(2)     |
| C46  | 8360(18)  | 891(11)    | 635(10)    | 47(2)     |
| C47  | 6987(15)  | 695(10)    | 712(8)     | 40(2)     |
| C48  | 6581(18)  | -127(13)   | 1166(15)   | 45(3)     |
| C37  | 6484(4)   | 3146(3)    | -178(3)    | 39.6(10)  |
| C38  | 7837(4)   | 3430(3)    | -7(3)      | 34.3(9)   |
| C39  | 8647(5)   | 3085(3)    | -572(3)    | 44.1(11)  |
| C40  | 8124(6)   | 2449(3)    | -1312(3)   | 56.2(14)  |
| C41  | 6770(6)   | 2179(4)    | -1488(3)   | 65.5(17)  |
| C42  | 5963(5)   | 2534(3)    | -923(3)    | 53.4(13)  |
| B1   | 7848(5)   | 7606(3)    | 3238(3)    | 32.2(10)  |
| F1   | 8921(3)   | 7629(3)    | 2777(3)    | 101.5(13) |
| F2   | 8036(4)   | 8448(2)    | 3792(2)    | 94.2(13)  |
| F3   | 6723(3)   | 7491(2)    | 2690.9(16) | 53.3(7)   |
| F4   | 7878(4)   | 6792(2)    | 3669(2)    | 90.8(12)  |

sTable 7: Anisotropic Displacement Parameters ( $\text{\AA}^2 \times 10^3$ ) for sbd1505. The Anisotropic displacement factor exponent takes the form:  $-2\pi^2[h2a^*2U11+2hka^*b^*U12+\dots]$ .

| Atom | U11      | U22      | U33      | U23      | U13      | U12      |
|------|----------|----------|----------|----------|----------|----------|
| C1   | 17.2(16) | 11.8(13) | 16.3(16) | -4.4(11) | 1.2(13)  | 3.0(12)  |
| C2   | 12.7(16) | 23.3(16) | 25.8(19) | -0.8(13) | 2.3(14)  | 1.8(13)  |
| C3   | 14.8(16) | 21.8(16) | 25.4(19) | 1.7(13)  | 5.4(14)  | 3.4(13)  |
| C4   | 11.5(15) | 23.6(16) | 15.0(16) | 0.3(12)  | -0.9(12) | 4.3(13)  |
| C5   | 16.6(16) | 26.1(17) | 19.8(18) | -6.1(13) | 1.0(13)  | 3.9(14)  |
| C6   | 23.1(19) | 35.6(19) | 19.4(19) | -9.1(14) | -1.4(15) | 6.9(16)  |
| C7   | 22.4(18) | 43(2)    | 17.2(18) | 0.9(15)  | -1.7(14) | 12.1(17) |
| C8   | 14.8(16) | 31.4(18) | 22.4(18) | 5.9(14)  | 1.5(14)  | 9.3(14)  |
| C9   | 11.6(15) | 26.0(16) | 15.9(16) | -1.7(12) | 0.2(12)  | 3.7(13)  |
| C10  | 37(2)    | 27.2(19) | 35(2)    | -7.3(16) | -2.8(18) | 5.1(17)  |
| C11  | 47(3)    | 57(3)    | 19(2)    | 1.7(18)  | -4.5(18) | 17(2)    |
| C12  | 24.3(18) | 22.2(16) | 21.5(18) | -1.7(13) | -1.0(14) | 6.9(14)  |
| C13  | 14.3(15) | 16.9(14) | 16.1(16) | 3.3(12)  | 3.9(12)  | 2.7(12)  |
| C14  | 17.6(16) | 19.2(15) | 19.7(17) | 2.4(12)  | 7.5(13)  | 4.1(13)  |
| C15  | 20.2(17) | 23.7(16) | 17.1(17) | 1.2(13)  | 1.9(13)  | 3.0(14)  |
| C16  | 15.9(16) | 20.3(15) | 24.2(18) | 8.8(13)  | 2.5(14)  | 3.0(13)  |
| C17  | 19.2(17) | 13.7(14) | 26.5(19) | 4.8(12)  | 6.0(14)  | 6.4(13)  |
| C18  | 15.0(16) | 18.1(15) | 20.3(17) | 3.3(12)  | 6.6(13)  | -0.3(13) |
| C19  | 30(2)    | 23.0(17) | 23.6(19) | 0.6(14)  | 4.7(15)  | 10.9(15) |
| C20  | 24.1(19) | 24.4(17) | 32(2)    | 4.3(15)  | -1.3(16) | 6.6(15)  |
| C21  | 24.0(18) | 19.8(16) | 22.1(18) | -0.3(13) | 4.9(14)  | 1.0(14)  |
| C22  | 18.1(16) | 14.6(14) | 22.4(18) | -0.5(12) | 2.8(13)  | 2.3(13)  |
| C23  | 21.1(17) | 17.9(15) | 28.6(19) | 3.0(13)  | 6.2(15)  | 8.8(14)  |
| C24  | 19.2(17) | 22.0(16) | 28(2)    | 7.3(14)  | 5.1(14)  | 10.0(14) |
| C25  | 17.1(16) | 24.2(16) | 19.8(17) | 5.9(13)  | 2.5(13)  | 4.2(14)  |
| C26  | 13.3(15) | 15.5(14) | 18.2(16) | 1.9(12)  | 2.6(12)  | 3.1(12)  |
| C27  | 13.2(15) | 15.5(14) | 15.7(16) | 1.3(11)  | 0.7(12)  | 1.9(12)  |
| C28  | 20.7(17) | 20.3(15) | 18.7(17) | 2.6(12)  | -1.4(14) | 3.2(14)  |
| C29  | 24.3(18) | 20.2(16) | 19.0(18) | -5.1(13) | -1.8(14) | 1.3(14)  |
| C30  | 28.3(19) | 18.7(15) | 22.8(19) | -1.9(13) | 2.7(15)  | 7.2(14)  |
| C31  | 17.0(16) | 16.6(15) | 22.1(18) | 0.8(12)  | 0.6(13)  | 6.7(13)  |
| C32  | 18.9(17) | 20.9(15) | 17.6(17) | 3.2(12)  | 0.1(13)  | 6.2(13)  |
| C33  | 21.8(18) | 22.2(16) | 22.9(18) | 6.2(13)  | -0.5(14) | 0.6(14)  |
| C34  | 16.6(17) | 33.9(19) | 24.7(19) | 12.3(15) | 2.8(14)  | 3.6(15)  |
| C35  | 15.7(16) | 32.0(18) | 18.8(17) | 1.8(14)  | 3.7(13)  | 7.9(14)  |
| C36  | 16.8(16) | 21.9(15) | 12.6(16) | 0.3(12)  | 0.0(12)  | 5.6(13)  |
| Ir1  | 12.28(6) | 15.26(6) | 13.06(7) | -0.26(4) | -0.41(4) | 3.09(4)  |
| N1   | 14.5(13) | 18.6(13) | 16.0(14) | -2.2(10) | 1.2(11)  | 1.6(11)  |
| N2   | 14.6(13) | 17.5(12) | 19.4(15) | 2.4(10)  | 1.0(11)  | 2.2(11)  |
| N3   | 12.9(13) | 13.2(12) | 18.6(14) | 0.9(10)  | 3.2(11)  | 2.3(10)  |
| N4   | 17.1(13) | 14.4(12) | 12.7(13) | 0.8(9)   | 1(1)     | 2.6(11)  |
| N5   | 13.4(13) | 22.8(13) | 14.4(14) | 1.4(10)  | 0.0(11)  | 2.3(11)  |
| C43  | 53(4)    | 31(3)    | 28(3)    | -8.9(18) | 0(3)     | -2(3)    |
| C43A | 53(4)    | 31(3)    | 28(3)    | -8.9(18) | 0(3)     | -2(3)    |
| C48A | 74(6)    | 29(7)    | 28(5)    | -10(5)   | -4(4)    | 11(5)    |
| C47A | 53(5)    | 35(3)    | 30(3)    | -7(2)    | -4(4)    | 16(5)    |
| C46A | 71(6)    | 38(3)    | 30(3)    | 2(2)     | 11(4)    | -2(4)    |

|      |          |          |          |           |           |           |
|------|----------|----------|----------|-----------|-----------|-----------|
| C45A | 61(4)    | 37(5)    | 50(4)    | -2(4)     | 21(3)     | 7(4)      |
| C44A | 62(4)    | 25(5)    | 37(4)    | -9(3)     | 8(3)      | 5(4)      |
| C44  | 62(4)    | 25(5)    | 37(4)    | -9(3)     | 8(3)      | 5(4)      |
| C45  | 61(4)    | 37(5)    | 50(4)    | -2(4)     | 21(3)     | 7(4)      |
| C46  | 71(6)    | 38(3)    | 30(3)    | 2(2)      | 11(4)     | -2(4)     |
| C47  | 53(5)    | 35(3)    | 30(3)    | -7(2)     | -4(4)     | 16(5)     |
| C48  | 74(6)    | 29(7)    | 28(5)    | -10(5)    | -4(4)     | 11(5)     |
| C37  | 39(3)    | 38(2)    | 42(3)    | 7.9(18)   | 0(2)      | 9(2)      |
| C38  | 39(2)    | 38(2)    | 27(2)    | 9.2(16)   | -3.1(18)  | 10.1(19)  |
| C39  | 43(3)    | 49(3)    | 42(3)    | 15(2)     | 7(2)      | 6(2)      |
| C40  | 70(4)    | 54(3)    | 43(3)    | 2(2)      | 29(3)     | -7(3)     |
| C41  | 86(4)    | 64(3)    | 33(3)    | -3(2)     | 11(3)     | -29(3)    |
| C42  | 50(3)    | 58(3)    | 43(3)    | 8(2)      | -3(2)     | -16(3)    |
| B1   | 32(2)    | 25(2)    | 38(3)    | 10.4(18)  | -4(2)     | -0.8(19)  |
| F1   | 45(2)    | 140(3)   | 111(3)   | -7(2)     | 21(2)     | -5(2)     |
| F2   | 99(3)    | 63.8(19) | 106(3)   | -42.5(18) | -56(2)    | 45.1(19)  |
| F3   | 41.7(15) | 70.7(17) | 41.5(16) | 3.0(13)   | -14.1(12) | 5.1(14)   |
| F4   | 107(3)   | 52.6(17) | 102(3)   | 43.7(17)  | -36(2)    | -12.1(18) |

sTable 8: Bond Lengths for **3**

| Atom | Atom | Length/Å | Atom | Atom | Length/Å  |
|------|------|----------|------|------|-----------|
| C1   | Ir1  | 1.981(3) | C28  | C29  | 1.382(4)  |
| C1   | N1   | 1.381(4) | C29  | C30  | 1.380(5)  |
| C1   | N2   | 1.371(4) | C30  | C31  | 1.384(4)  |
| C2   | C3   | 1.335(5) | C31  | N4   | 1.341(4)  |
| C2   | N1   | 1.385(4) | C32  | C33  | 1.381(4)  |
| C3   | N2   | 1.384(4) | C32  | N5   | 1.347(4)  |
| C4   | C5   | 1.391(4) | C33  | C34  | 1.376(5)  |
| C4   | C9   | 1.389(4) | C34  | C35  | 1.383(5)  |
| C4   | N1   | 1.441(4) | C35  | C36  | 1.382(4)  |
| C5   | C6   | 1.399(5) | C36  | N5   | 1.339(4)  |
| C5   | C10  | 1.512(5) | Ir1  | N3   | 2.156(3)  |
| C6   | C7   | 1.382(5) | Ir1  | N4   | 2.151(2)  |
| C7   | C8   | 1.383(5) | Ir1  | N5   | 2.110(3)  |
| C7   | C11  | 1.509(5) | C43  | C44  | 1.344(16) |
| C8   | C9   | 1.397(5) | C43  | C48  | 1.349(17) |
| C9   | C12  | 1.501(4) | C43A | C48A | 1.3900    |
| C13  | C14  | 1.389(4) | C43A | C44A | 1.3900    |
| C13  | C18  | 1.401(4) | C48A | C47A | 1.3900    |
| C13  | N2   | 1.432(4) | C47A | C46A | 1.3900    |
| C14  | C15  | 1.395(4) | C46A | C45A | 1.3900    |
| C14  | C19  | 1.505(4) | C45A | C44A | 1.3900    |
| C15  | C16  | 1.388(5) | C44  | C45  | 1.381(19) |
| C16  | C17  | 1.388(5) | C45  | C46  | 1.35(2)   |
| C16  | C20  | 1.508(4) | C46  | C47  | 1.429(17) |
| C17  | C18  | 1.391(4) | C47  | C48  | 1.413(17) |
| C18  | C21  | 1.502(4) | C37  | C38  | 1.390(6)  |
| C22  | C23  | 1.373(4) | C37  | C42  | 1.364(6)  |
| C22  | N3   | 1.351(4) | C38  | C39  | 1.372(6)  |



|     |     |          |     |     |          |
|-----|-----|----------|-----|-----|----------|
| C23 | C24 | 1.382(5) | C39 | C40 | 1.376(6) |
| C24 | C25 | 1.381(4) | C40 | C41 | 1.390(7) |
| C25 | C26 | 1.383(4) | C41 | C42 | 1.376(7) |
| C26 | C27 | 1.478(4) | B1  | F1  | 1.379(6) |
| C26 | N3  | 1.353(4) | B1  | F2  | 1.340(5) |
| C27 | C28 | 1.385(4) | B1  | F3  | 1.352(5) |
| C27 | N4  | 1.357(4) | B1  | F4  | 1.354(5) |

sTable 9: Bond Angles for **3**.

| Atom | Atom | Atom | Angle/°  | Atom | Atom | Atom | Angle/°    |
|------|------|------|----------|------|------|------|------------|
| N1   | C1   | Ir1  | 125.9(2) | C33  | C34  | C35  | 118.8(3)   |
| N2   | C1   | Ir1  | 131.2(2) | C36  | C35  | C34  | 118.7(3)   |
| N2   | C1   | N1   | 102.6(3) | N5   | C36  | C35  | 123.2(3)   |
| C3   | C2   | N1   | 107.2(3) | C1   | Ir1  | N3   | 103.37(11) |
| C2   | C3   | N2   | 106.9(3) | C1   | Ir1  | N4   | 95.59(11)  |
| C5   | C4   | N1   | 117.2(3) | C1   | Ir1  | N5   | 170.16(11) |
| C9   | C4   | C5   | 122.3(3) | N4   | Ir1  | N3   | 75.79(9)   |
| C9   | C4   | N1   | 120.5(3) | N5   | Ir1  | N3   | 86.42(10)  |
| C4   | C5   | C6   | 117.7(3) | N5   | Ir1  | N4   | 87.67(10)  |
| C4   | C5   | C10  | 121.1(3) | C1   | N1   | C2   | 111.4(3)   |
| C6   | C5   | C10  | 121.2(3) | C1   | N1   | C4   | 126.9(3)   |
| C7   | C6   | C5   | 121.8(3) | C2   | N1   | C4   | 121.2(3)   |
| C6   | C7   | C8   | 118.4(3) | C1   | N2   | C3   | 111.9(3)   |
| C6   | C7   | C11  | 120.5(3) | C1   | N2   | C13  | 125.6(3)   |
| C8   | C7   | C11  | 121.1(3) | C3   | N2   | C13  | 122.3(3)   |
| C7   | C8   | C9   | 122.1(3) | C22  | N3   | C26  | 118.3(3)   |
| C4   | C9   | C8   | 117.5(3) | C22  | N3   | Ir1  | 124.9(2)   |
| C4   | C9   | C12  | 122.6(3) | C26  | N3   | Ir1  | 116.30(19) |
| C8   | C9   | C12  | 119.8(3) | C27  | N4   | Ir1  | 116.6(2)   |
| C14  | C13  | C18  | 122.0(3) | C31  | N4   | C27  | 118.4(3)   |
| C14  | C13  | N2   | 119.4(3) | C31  | N4   | Ir1  | 124.9(2)   |
| C18  | C13  | N2   | 118.5(3) | C32  | N5   | Ir1  | 119.1(2)   |
| C13  | C14  | C15  | 117.7(3) | C36  | N5   | C32  | 117.4(3)   |
| C13  | C14  | C19  | 121.9(3) | C36  | N5   | Ir1  | 123.4(2)   |
| C15  | C14  | C19  | 120.3(3) | C44  | C43  | C48  | 123.4(12)  |
| C16  | C15  | C14  | 121.8(3) | C48A | C43A | C44A | 120.0      |
| C15  | C16  | C20  | 120.7(3) | C47A | C48A | C43A | 120.0      |
| C17  | C16  | C15  | 118.8(3) | C48A | C47A | C46A | 120.0      |
| C17  | C16  | C20  | 120.5(3) | C45A | C46A | C47A | 120.0      |
| C16  | C17  | C18  | 121.5(3) | C46A | C45A | C44A | 120.0      |
| C13  | C18  | C21  | 120.9(3) | C45A | C44A | C43A | 120.0      |
| C17  | C18  | C13  | 118.0(3) | C43  | C44  | C45  | 119.4(13)  |
| C17  | C18  | C21  | 121.1(3) | C46  | C45  | C44  | 118.9(13)  |
| N3   | C22  | C23  | 122.4(3) | C45  | C46  | C47  | 123.0(13)  |
| C22  | C23  | C24  | 119.2(3) | C48  | C47  | C46  | 115.1(13)  |
| C25  | C24  | C23  | 118.9(3) | C43  | C48  | C47  | 119.8(15)  |
| C24  | C25  | C26  | 119.4(3) | C42  | C37  | C38  | 119.5(5)   |
| C25  | C26  | C27  | 122.6(3) | C39  | C38  | C37  | 120.5(4)   |
| N3   | C26  | C25  | 121.7(3) | C38  | C39  | C40  | 120.1(5)   |

|     |     |     |          |     |     |     |          |
|-----|-----|-----|----------|-----|-----|-----|----------|
| N3  | C26 | C27 | 115.7(3) | C39 | C40 | C41 | 119.2(5) |
| C28 | C27 | C26 | 123.2(3) | C42 | C41 | C40 | 120.4(5) |
| N4  | C27 | C26 | 115.3(3) | C37 | C42 | C41 | 120.3(5) |
| N4  | C27 | C28 | 121.5(3) | F2  | B1  | F1  | 107.6(4) |
| C29 | C28 | C27 | 119.5(3) | F2  | B1  | F3  | 112.5(4) |
| C30 | C29 | C28 | 119.1(3) | F2  | B1  | F4  | 111.6(4) |
| C29 | C30 | C31 | 118.7(3) | F3  | B1  | F1  | 111.1(4) |
| N4  | C31 | C30 | 122.7(3) | F3  | B1  | F4  | 110.1(3) |
| N5  | C32 | C33 | 122.8(3) | F4  | B1  | F1  | 103.5(4) |
| C34 | C33 | C32 | 119.1(3) |     |     |     |          |

sTable 10: Torsion Angles for **3**.

| A   | B   | C   | D   | Angle/°   | A    | B    | C    | D    | Angle/°   |
|-----|-----|-----|-----|-----------|------|------|------|------|-----------|
| C2  | C3  | N2  | C1  | 0.8(4)    | C28  | C27  | N4   | lr1  | 179.9(2)  |
| C2  | C3  | N2  | C13 | -175.0(3) | C28  | C29  | C30  | C31  | 0.3(5)    |
| C3  | C2  | N1  | C1  | -0.3(4)   | C29  | C30  | C31  | N4   | 0.2(5)    |
| C3  | C2  | N1  | C4  | 171.5(3)  | C30  | C31  | N4   | C27  | -1.6(5)   |
| C4  | C5  | C6  | C7  | 2.4(5)    | C30  | C31  | N4   | lr1  | -178.8(2) |
| C5  | C4  | C9  | C8  | -1.5(5)   | C32  | C33  | C34  | C35  | 0.4(5)    |
| C5  | C4  | C9  | C12 | 177.4(3)  | C33  | C32  | N5   | C36  | -0.1(5)   |
| C5  | C4  | N1  | C1  | 93.0(4)   | C33  | C32  | N5   | lr1  | -175.3(2) |
| C5  | C4  | N1  | C2  | -77.5(4)  | C33  | C34  | C35  | C36  | -0.7(5)   |
| C5  | C6  | C7  | C8  | -1.0(6)   | C34  | C35  | C36  | N5   | 0.6(5)    |
| C5  | C6  | C7  | C11 | 178.6(4)  | C35  | C36  | N5   | C32  | -0.2(5)   |
| C6  | C7  | C8  | C9  | -1.8(5)   | C35  | C36  | N5   | lr1  | 174.7(2)  |
| C7  | C8  | C9  | C4  | 3.0(5)    | lr1  | C1   | N1   | C2   | -173.6(2) |
| C7  | C8  | C9  | C12 | -175.9(3) | lr1  | C1   | N1   | C4   | 15.1(4)   |
| C9  | C4  | C5  | C6  | -1.1(5)   | lr1  | C1   | N2   | C3   | 173.0(2)  |
| C9  | C4  | C5  | C10 | 177.8(3)  | lr1  | C1   | N2   | C13  | -11.4(4)  |
| C9  | C4  | N1  | C1  | -89.5(4)  | N1   | C1   | N2   | C3   | -0.9(3)   |
| C9  | C4  | N1  | C2  | 100.0(4)  | N1   | C1   | N2   | C13  | 174.7(3)  |
| C10 | C5  | C6  | C7  | -176.6(3) | N1   | C2   | C3   | N2   | -0.3(4)   |
| C11 | C7  | C8  | C9  | 178.6(3)  | N1   | C4   | C5   | C6   | 176.3(3)  |
| C13 | C14 | C15 | C16 | -0.9(5)   | N1   | C4   | C5   | C10  | -4.7(5)   |
| C14 | C13 | C18 | C17 | -4.0(5)   | N1   | C4   | C9   | C8   | -178.8(3) |
| C14 | C13 | C18 | C21 | 175.7(3)  | N1   | C4   | C9   | C12  | 0.0(5)    |
| C14 | C13 | N2  | C1  | 105.5(4)  | N2   | C1   | N1   | C2   | 0.7(3)    |
| C14 | C13 | N2  | C3  | -79.4(4)  | N2   | C1   | N1   | C4   | -170.5(3) |
| C14 | C15 | C16 | C17 | -2.4(5)   | N2   | C13  | C14  | C15  | -179.6(3) |
| C14 | C15 | C16 | C20 | 177.1(3)  | N2   | C13  | C14  | C19  | 1.3(5)    |
| C15 | C16 | C17 | C18 | 2.6(5)    | N2   | C13  | C18  | C17  | 179.8(3)  |
| C16 | C17 | C18 | C13 | 0.5(5)    | N2   | C13  | C18  | C21  | -0.5(4)   |
| C16 | C17 | C18 | C21 | -179.2(3) | N3   | C22  | C23  | C24  | -1.6(5)   |
| C18 | C13 | C14 | C15 | 4.2(5)    | N3   | C26  | C27  | C28  | 176.1(3)  |
| C18 | C13 | C14 | C19 | -174.9(3) | N3   | C26  | C27  | N4   | -3.8(4)   |
| C18 | C13 | N2  | C1  | -78.2(4)  | N4   | C27  | C28  | C29  | -2.0(5)   |
| C18 | C13 | N2  | C3  | 96.9(4)   | N5   | C32  | C33  | C34  | 0.1(5)    |
| C19 | C14 | C15 | C16 | 178.2(3)  | C43  | C44  | C45  | C46  | -6.2(17)  |
| C20 | C16 | C17 | C18 | -176.9(3) | C43A | C48A | C47A | C46A | 0.0       |
| C22 | C23 | C24 | C25 | -0.3(5)   | C48A | C43A | C44A | C45A | 0.0       |

|     |     |     |     |           |      |      |      |      |          |
|-----|-----|-----|-----|-----------|------|------|------|------|----------|
| C23 | C22 | N3  | C26 | 2.1(5)    | C48A | C47A | C46A | C45A | 0.0      |
| C23 | C22 | N3  | lr1 | 173.4(2)  | C47A | C46A | C45A | C44A | 0.0      |
| C23 | C24 | C25 | C26 | 1.5(5)    | C46A | C45A | C44A | C43A | 0.0      |
| C24 | C25 | C26 | C27 | -179.7(3) | C44A | C43A | C48A | C47A | 0.0      |
| C24 | C25 | C26 | N3  | -1.0(5)   | C44  | C43  | C48  | C47  | -3.6(16) |
| C25 | C26 | C27 | C28 | -5.1(5)   | C44  | C45  | C46  | C47  | 7(2)     |
| C25 | C26 | C27 | N4  | 174.9(3)  | C45  | C46  | C47  | C48  | -5(2)    |
| C25 | C26 | N3  | C22 | -0.8(4)   | C46  | C47  | C48  | C43  | 3.4(17)  |
| C25 | C26 | N3  | lr1 | -172.8(2) | C48  | C43  | C44  | C45  | 5.0(16)  |
| C26 | C27 | C28 | C29 | 178.1(3)  | C37  | C38  | C39  | C40  | -0.4(6)  |
| C26 | C27 | N4  | C31 | -177.5(3) | C38  | C37  | C42  | C41  | 1.7(7)   |
| C26 | C27 | N4  | lr1 | -0.2(3)   | C38  | C39  | C40  | C41  | 1.4(7)   |
| C27 | C26 | N3  | C22 | 178.0(3)  | C39  | C40  | C41  | C42  | -0.8(8)  |
| C27 | C26 | N3  | lr1 | 6.0(3)    | C40  | C41  | C42  | C37  | -0.8(8)  |
| C27 | C28 | C29 | C30 | 0.5(5)    | C42  | C37  | C38  | C39  | -1.1(6)  |
| C28 | C27 | N4  | C31 | 2.5(5)    |      |      |      |      |          |

sTable 11: Hydrogen Atom Coordinates ( $\text{\AA}\times 10^4$ ) and Isotropic Displacement Parameters ( $\text{\AA}^2\times 10^3$ ) for **3**

| Atom | x     | y    | z     | U(eq) |
|------|-------|------|-------|-------|
| H2   | 2010  | 2400 | 3033  | 25    |
| H3   | 2917  | 1764 | 4342  | 25    |
| H6   | 2859  | 2096 | -97   | 32    |
| H8   | 3656  | 4973 | 857   | 27    |
| H10A | 2722  | 1027 | 1728  | 51    |
| H10B | 4213  | 1126 | 1600  | 51    |
| H10C | 3141  | 810  | 791   | 51    |
| H11A | 2185  | 4205 | -699  | 61    |
| H11B | 2735  | 3270 | -1086 | 61    |
| H11C | 3677  | 4293 | -817  | 61    |
| H12A | 4927  | 5287 | 2505  | 34    |
| H12B | 4166  | 4580 | 3092  | 34    |
| H12C | 3422  | 5270 | 2543  | 34    |
| H15  | 6995  | 2336 | 6536  | 25    |
| H17  | 7099  | -42  | 4833  | 23    |
| H19A | 4589  | 3136 | 5887  | 38    |
| H19B | 5221  | 3627 | 5122  | 38    |
| H19C | 6022  | 3735 | 6050  | 38    |
| H20A | 8060  | 27   | 6340  | 40    |
| H20B | 8011  | 956  | 7012  | 40    |
| H20C | 9055  | 1018 | 6346  | 40    |
| H21A | 5961  | -269 | 3416  | 33    |
| H21B | 5756  | 712  | 3010  | 33    |
| H21C | 4603  | 98   | 3409  | 33    |
| H22  | 8011  | 1109 | 2657  | 22    |
| H23  | 9499  | 301  | 3369  | 26    |
| H24  | 10587 | 1012 | 4725  | 26    |
| H25  | 10145 | 2536 | 5324  | 24    |
| H28  | 9504  | 3864 | 5872  | 24    |

|      |          |          |          |       |
|------|----------|----------|----------|-------|
| H29  | 8936     | 5404     | 6300     | 27    |
| H30  | 7508     | 6066     | 5353     | 28    |
| H31  | 6687     | 5175     | 4017     | 22    |
| H32  | 8242     | 5204     | 2709     | 23    |
| H33  | 9983     | 6038     | 2124     | 27    |
| H34  | 11423    | 5138     | 1474     | 29    |
| H35  | 11045    | 3403     | 1418     | 26    |
| H36  | 9289     | 2637     | 2033     | 21    |
| H43  | 7197     | -1142    | 1850     | 47    |
| H43A | 6773     | -1013    | 1755     | 47    |
| H48A | 5965     | 214      | 1030     | 54    |
| H47A | 7368     | 1324     | 369      | 48    |
| H46A | 9578     | 1207     | 433      | 57    |
| H45A | 10386    | -20      | 1158     | 59    |
| H44A | 8983     | -1130    | 1819     | 51    |
| H44  | 9340     | -820     | 1664     | 51    |
| H45  | 10124    | 578      | 1007     | 59    |
| H46  | 8667     | 1390     | 302      | 57    |
| H47  | 6404     | 1080     | 481      | 48    |
| H48  | 5697     | -323     | 1215     | 54    |
| H37  | 5939     | 3371     | 211      | 47    |
| H38  | 8195     | 3856     | 494      | 41    |
| H39  | 9550     | 3283     | -455     | 53    |
| H40  | 8670     | 2203     | -1691    | 67    |
| H41  | 6408     | 1756     | -1991    | 79    |
| H42  | 5057     | 2356     | -1049    | 64    |
| H    | 6520(30) | 2540(20) | 2140(20) | 11(8) |
| HA   | 6220(30) | 3840(20) | 2460(20) | 17(9) |

sTable 12: Atomic Occupancy for **3**

| Atom | Occupancy | Atom | Occupancy | Atom | Occupancy |
|------|-----------|------|-----------|------|-----------|
| C43  | 0.435(8)  | H43  | 0.435(8)  | C43A | 0.565(8)  |
| H43A | 0.565(8)  | C48A | 0.565(8)  | H48A | 0.565(8)  |
| C47A | 0.565(8)  | H47A | 0.565(8)  | C46A | 0.565(8)  |
| H46A | 0.565(8)  | C45A | 0.565(8)  | H45A | 0.565(8)  |
| C44A | 0.565(8)  | H44A | 0.565(8)  | C44  | 0.435(8)  |
| H44  | 0.435(8)  | C45  | 0.435(8)  | H45  | 0.435(8)  |
| C46  | 0.435(8)  | H46  | 0.435(8)  | C47  | 0.435(8)  |
| H47  | 0.435(8)  | C48  | 0.435(8)  | H48  | 0.435(8)  |

## 11. References

1. O. Torres, M. Martin and E. Sola, *Organometallics*, 2009, 28, 863-870.
2. R. E. Mewis, K. D. Atkinson, M. J. Cowley, S. B. Duckett, G. G. R. Green, R. A. Green, L. A. R. Highton, D. Kilgour, L. S. Lloyd, J. A. B. Lohman and D. C. Williamson, *Magn. Reson. Chem.*, 2014, 52, 358-369.
3. Dolomanov, O.V., Bourhis, L.J., Gildea, R.J, Howard, J.A.K. & Puschmann, H. (2009), *J. Appl. Cryst.* 42, 339-341.
4. Palatinus, L. & Chapuis, G. (2007). *J. Appl. Cryst.*, 40, 786-790; Palatinus, L. & van der Lee, A. (2008). *J. Appl. Cryst.* 41, 975-984; Palatinus, L., Prathapa, S. J. & van Smaalen, S. (2012). *J. Appl. Cryst.* 45, 575-580.

5. Sheldrick, G.M. (2008). *Acta Cryst.* A64, 112-122.
6. Bain, A. D., Chemical Exchange in Nmr. *Prog. Nucl. Magn. Reson. Spectrosc.* **2003**, 43, 63-103.
